# Supplementary material for: Evolution of cobalt hydroxide from 2D microplatelets to a 3D hierarchical structure mediated by precursor concentration
Source: Royal Society of Chemistry journal article supplement (doi:10.1039/c3ra41351a), 2013-01-01
Supplement: c3ra41351a.pdf [file c3ra41351a.pdf]

## Evolution of cobalt hydroxide from 2D microplatelets to 3D hierarchical structure mediated by precursor concentration

J.P. Cheng<sup>1,2,\*</sup>, M. Li<sup>1</sup>, W.F. Zhang<sup>1</sup>, J.S. Wu<sup>2,\*</sup>, F. Liu<sup>1</sup>, X.B. Zhang<sup>1</sup>

<sup>1</sup> Department of Materials Science and Engineering, State Key Laboratory of Silicon Materials, Key Laboratory of Advanced Materials and Applications for Batteries of Zhejiang Province, Zhejiang University, Hangzhou 310027, China

<sup>2</sup> Department of Materials Science and Engineering, Northwestern University, Evanston, Illinois 60208, United States.

\*Corresponding author. E-mail address: chengjp@zju.edu.cn; jinsong-wu@northwestern.edu

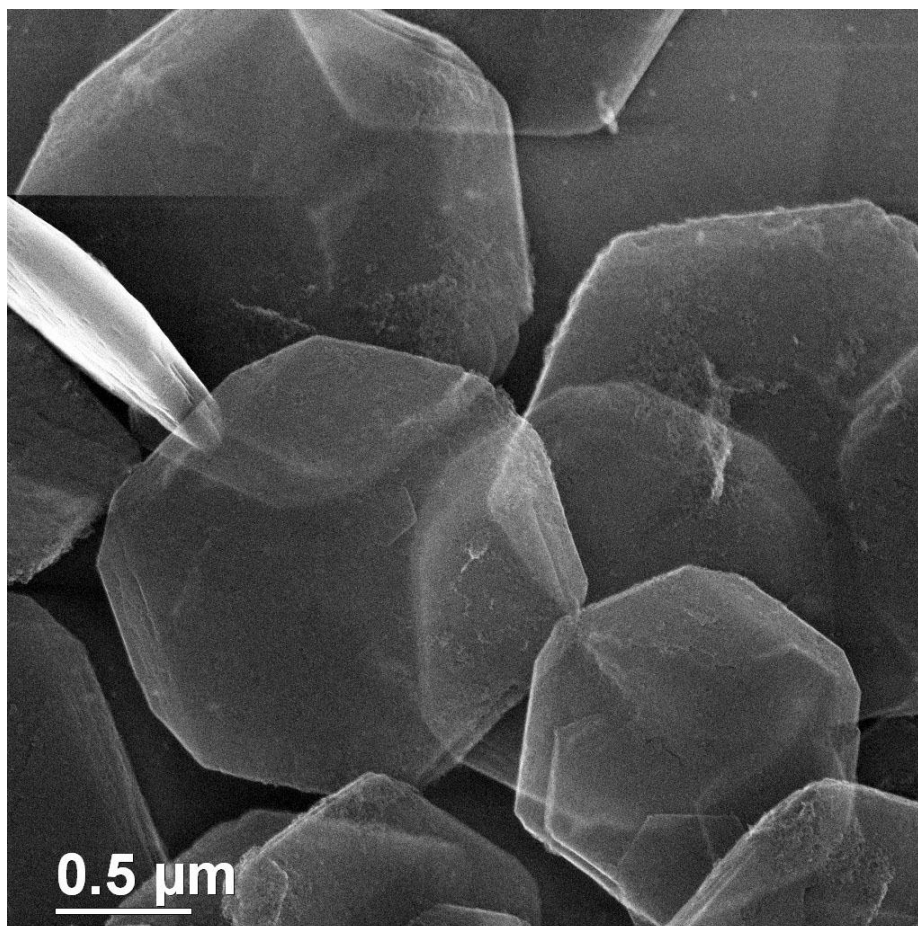

Figure S1 SEM image of  $\text{Co(OH)}_2$  microplatelets with  $0.05 \text{ mol L}^{-1}$  cobalt salt.

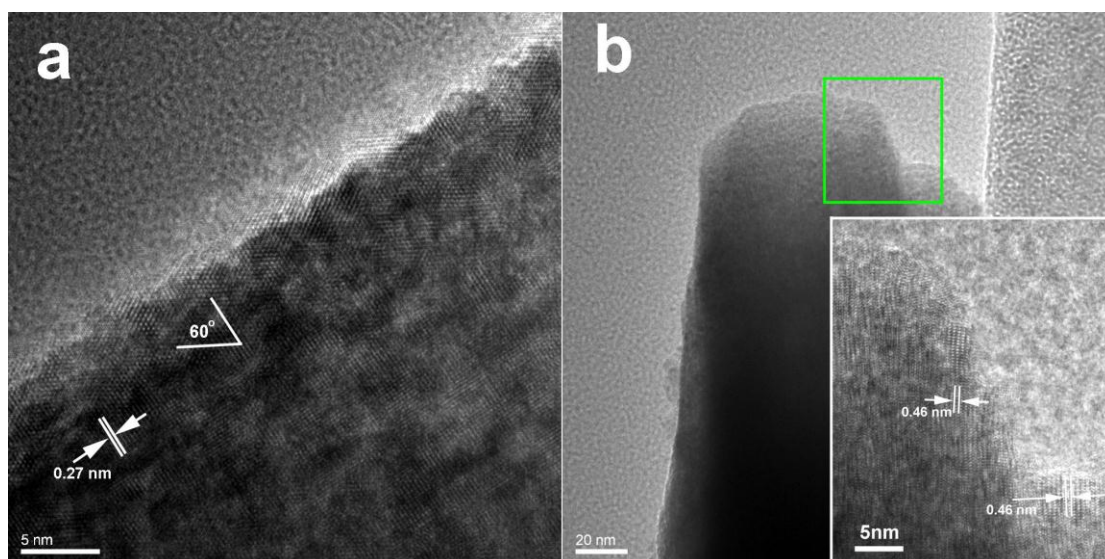

Figure S2 HRTEM images of  $\text{Co(OH)}_2$  microplatelets from different orientations; the microplatelets were prepared with  $0.05 \text{ mol L}^{-1}$  cobalt salt.

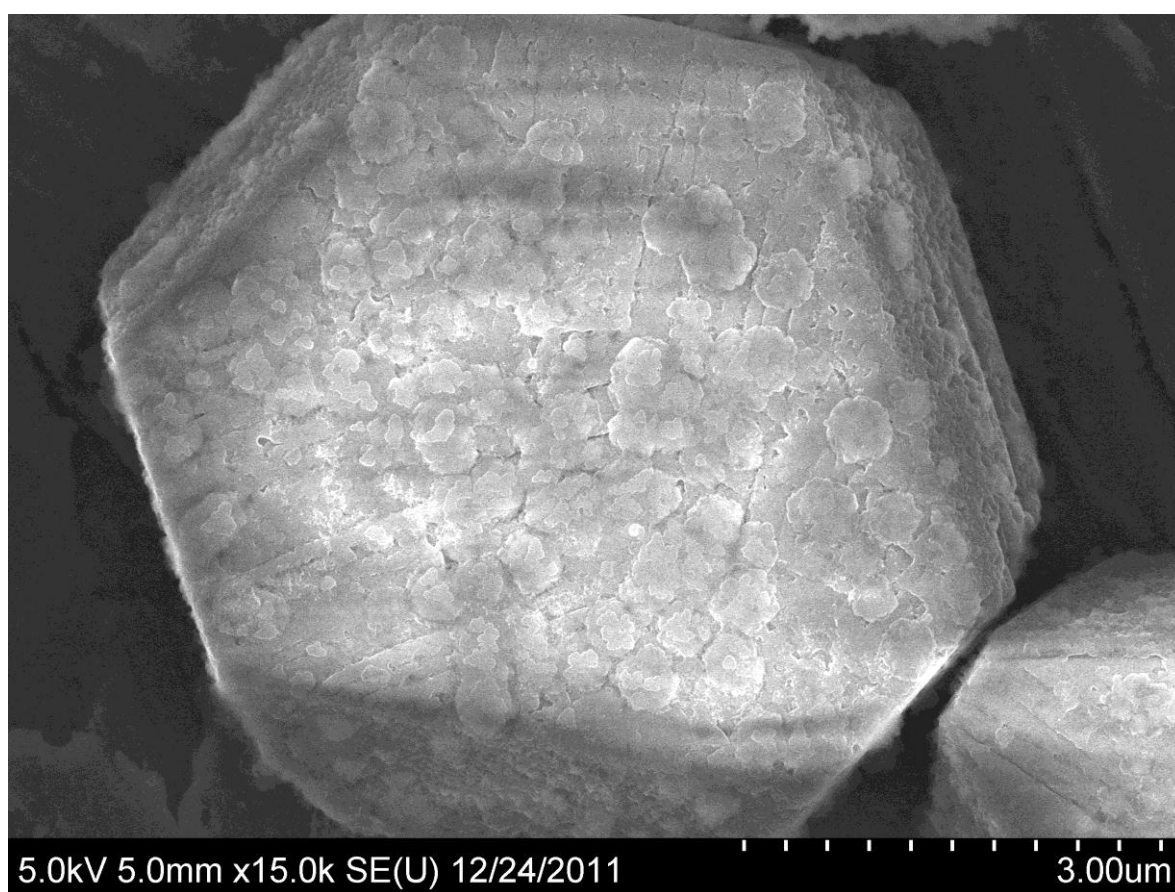

Figure S3 SEM image of  $\text{Co(OH)}_2$  microplatelet with  $0.1 \text{ mol L}^{-1}$  cobalt salt for 10 min reaction.

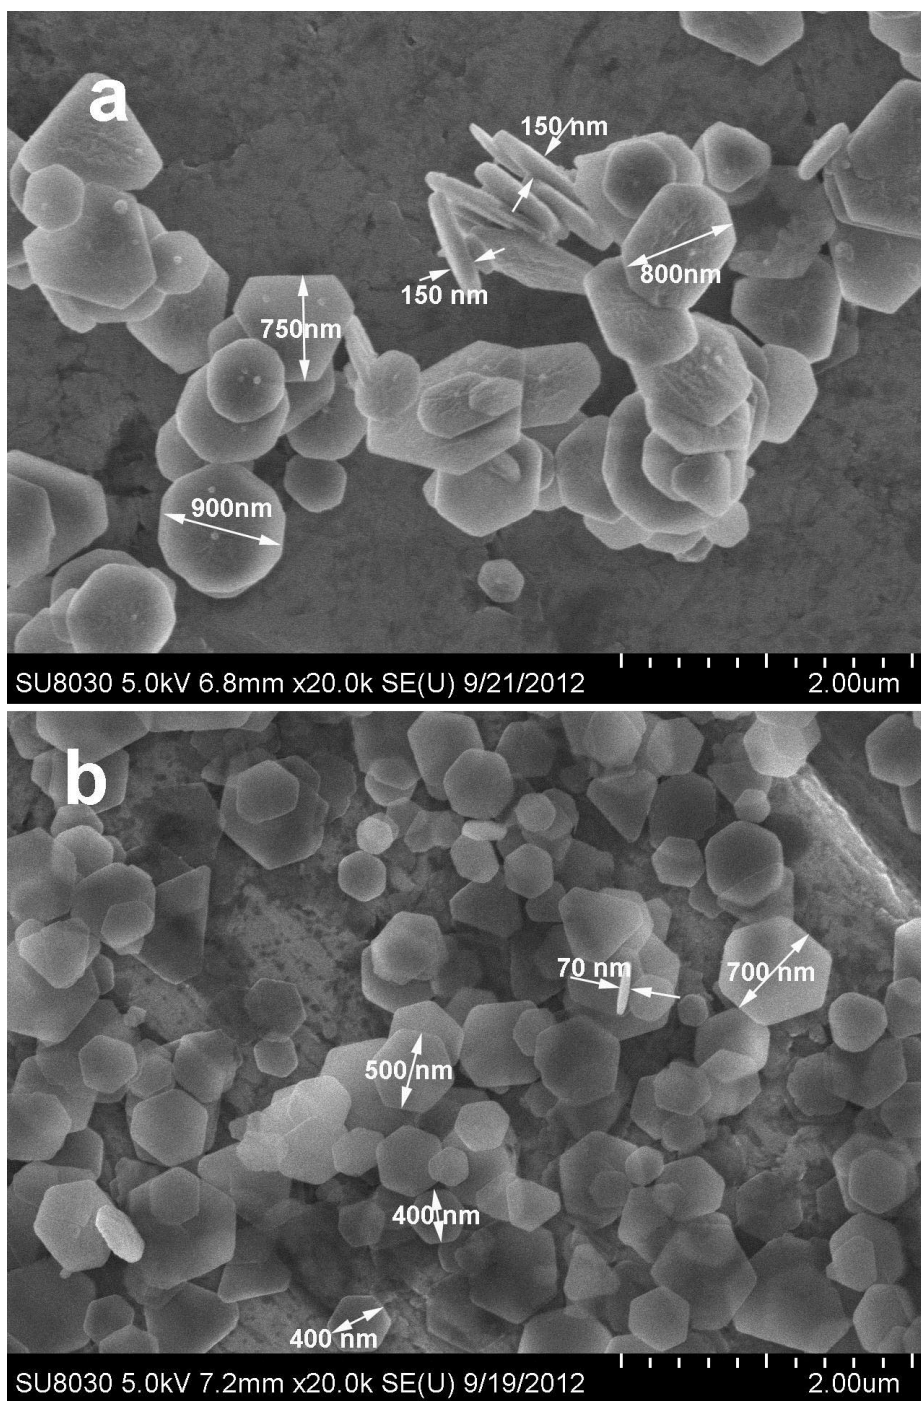

Figure S4 SEM image of  $\text{Co(OH)}_2$  microplatelets prepared under different cobalt concentrations, (a)  $0.025 \text{ mol L}^{-1}$  (b)  $0.01 \text{ mol L}^{-1}$ , showing smaller and thinner microplatelets formed under a lower salt concentration.
